# Supplementary material for: Biochar Decreases Cr Toxicity and Accumulation in Sunflower Grown in Cr(VI)-Polluted Soil
Source: MDPI journal article supplement (doi:10.3390/toxics11090787), 2023-09-16
Supplement: s1 [file s1]

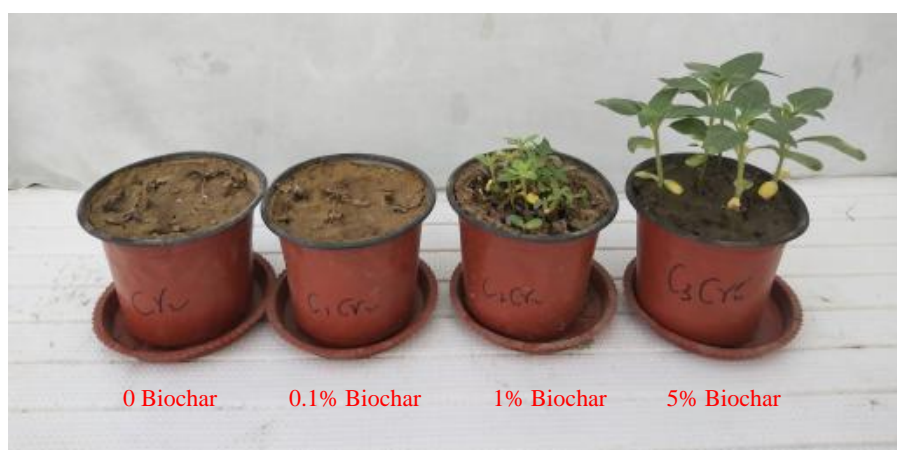

**Figure S1.** The growth status of seedlings grown in the soil with 250 mg/kg Cr(VI).

**Table S1.** Effects of biochar on N, P, and K concentrations in oil sunflower seedlings in different Cr treatments.

| Cr<br>(mg/kg)    | Biochar      | N conc. (%)  |             | P conc. (%)  |             | K conc. (%)  |              |
|------------------|--------------|--------------|-------------|--------------|-------------|--------------|--------------|
|                  |              | Shoot        | Root        | Shoot        | Root        | Shoot        | Root         |
| 0                | 0            | 1.68(0.08)d  | 1.19(0.08)c | 0.82(0.06)b  | 0.66(0.05)d | 3.44(0.22)c  | 3.98(0.33)a  |
|                  | 0.1%         | 1.92(0.07)cd | 1.22(0.12)c | 0.82(0.05)b  | 0.72(0.08)d | 3.34(0.20)c  | 3.56(0.48)bc |
|                  | 1%           | 2.13(0.53)c  | 1.25(0.14)c | 0.82(0.09)b  | 0.75(0.04)d | 3.91(0.47)b  | 3.64(0.32)b  |
|                  | 5%           | 2.56(0.18)b  | 2.31(0.31)b | 0.83(0.05)b  | 0.63(0.04)d | 4.31(0.27)a  | 3.30(0.37)c  |
| 50               | 0            | 2.59(0.06)b  | 2.22(0.14)b | 0.70(0.12)c  | 1.79(0.22)b | 2.85(0.15)d  | 0.36(0.02)f  |
|                  | 0.1%         | 2.62(0.24)b  | 2.53(0.27)b | 0.67(0.08)cd | 1.51(0.15)c | 3.28(0.26)c  | 0.22(0.01)fg |
|                  | 1%           | 2.22(0.13)c  | 2.46(0.29)b | 0.56(0.02)d  | 0.74(0.04)d | 3.87(0.10)b  | 1.61(0.21)e  |
|                  | 5%           | 2.62(0.18)b  | 2.32(0.30)b | 0.66(0.04)cd | 0.66(0.04)d | 4.00(0.14)ab | 1.62(0.10)e  |
| 250              | 0            | —            | —           | —            | —           | —            | —            |
|                  | 0.1%         | —            | —           | —            | —           | —            | —            |
|                  | 1%           | 3.68(0.59)a  | 3.47(0.37)a | 1.46(0.34)a  | 2.28(0.21)a | 3.22(0.11)c  | 0.41(0.05)f  |
|                  | 5%           | 2.74(0.09)b  | 2.26(0.22)b | 0.59(0.05)cd | 0.70(0.08)d | 3.93(0.11)b  | 2.48(0.29)d  |
| Two-way<br>ANOVA | Cr           | 60.23*       | 119.60*     | 58.32*       | 195.31*     | 415.47*      | 840.58*      |
|                  | Biochar      | 104.43*      | 142.22*     | 79.28*       | 146.25*     | 279.21*      | 69.95*       |
|                  | Cr × Biochar | 85.93*       | 104.04*     | 102.31*      | 436.27*     | 81.03*       | 49.14*       |

— means no data, because seedlings died in these treatments. Different letters in the same column mean significant differences among all the treatments at  $p < 0.05$ . Significance level: \* $p < 0.01$ .
